# Supplementary material for: The Role of MECP2 and CCR5 Polymorphisms on the Development and Course of Systemic Lupus Erythematosus
Source: MDPI journal article supplement (doi:10.3390/biom10030494), 2020-03-24
Supplement: s1 [file s1]

**Table S1.** The minor allele frequency (MAF) of four chosen MECP2 SNPs: rs2075596, rs173478, rs17435, rs223946 and for CCR5 polymorphism: rs333.

| SNP ID          | Allele         | Type of SNP    | MAF  |          |                  |
|-----------------|----------------|----------------|------|----------|------------------|
|                 |                |                | SLE  | Controls | 1000Genomes – EU |
| MECP2 rs2075596 | A>C / A>G      | Intron Variant | 0.20 | 0.14     | 0.14             |
| MECP2 rs1734787 | A>C            | Intron Variant | 0.19 | 0.18     | 0.15             |
| MECP2 rs17435   | T>A / T>C      | Intron Variant | 0.29 | 0.22     | 0.19             |
| MECP2 rs2239464 | G>A            | Intron Variant | 0.26 | 0.22     | 0.19             |
| CCR5 rs333      | 32 bp deletion | Intron Variant | 0.12 | 0.13     | 0.11             |
